# Supplementary material for: A luminescent layered hybrid Ag–Ru/LDH as a photocatalytic antibacterial agent
Source: Royal Society of Chemistry journal article supplement (doi:10.1039/c7nj00853h), 2017-01-01
Supplement: c7nj00853h1.pdf [file c7nj00853h1.pdf]

New Journal of Chemistry

Supporting Information

## **Luminescent Layered Hybrid Ag-Ru/LDH as Photocatalytic Antibacterial Agent<sup>†</sup>**

By *Fangnan Xiao*<sup>‡ a,b</sup>, *Xiaolin Liu*<sup>‡ b,c</sup>, *Yue Xiao*<sup>b,d</sup>, *Fangman Chen*<sup>b,d</sup>, *Yunkun Wu*<sup>\* a,b</sup>

\* a. College of Life Science,

Fujian Normal University, Fuzhou, Fujian 350119, China.

\* b. State Key Laboratory of Structural Chemistry,

Fujian Institute of Research on the Structure of Matter, Chinese Academy of Sciences,  
Fuzhou, Fujian 350002, China.

c. Chinese Academy of Science, Beijing, 100049, China

d. School of life science, Fujian Agriculture and Forestry University, Fuzhou 350002,  
China.

‡These authors contributed equally to this work

[\*] Prof. Y. Wu

E-mail: [wuyk@fjnu.edu.cn](mailto:wuyk@fjnu.edu.cn); [wuyk@fjirsm.ac.cn](mailto:wuyk@fjirsm.ac.cn)(Y.Wu)

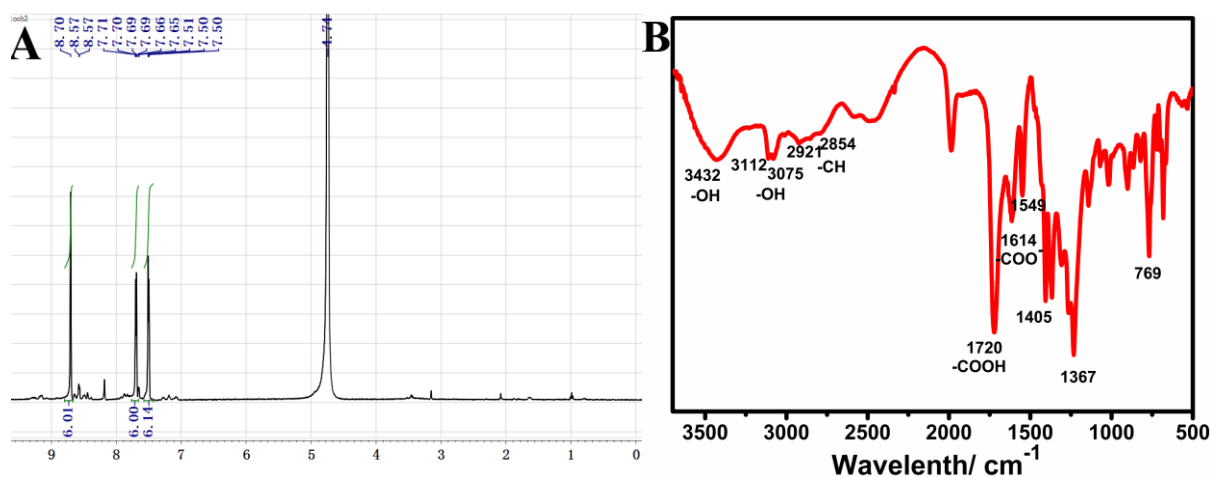

**Fig. S1** (A)  $^1\text{H}$  NMR spectra and (B) FTIR spectra of Ru complex.

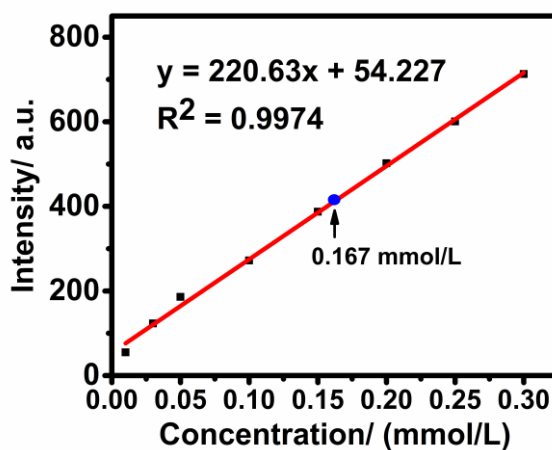

**Fig. S2** Quantitative analysis of Ru complex in the Ag-Ru/LDH hybrids. The amount of Ru was determined by measuring the Photoluminescence (PL) intensity of Ru at 630 nm. From the PL intensity of Ag-Ru/LDH (10 mg/ml), the content of Ru in the Ag-Ru/LDH was quantified to be 16.7 nmol/mg (0.17 % (w/w)).

$$C_{\text{Ru}} = 0.167 \text{ mmol/L} \div 10 \text{ mg/ml} = 16.7 \text{ nmol/mg}$$

$$C_{\text{Ru}} = 16.7 \text{ nmol/mg} \times 101 \text{ g/mol} \times 100 \% = 0.17 \%$$

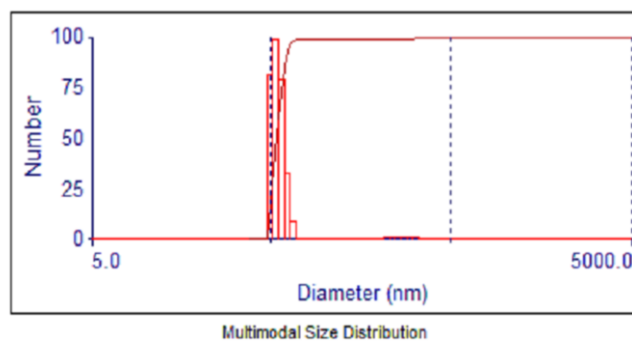

**Fig. S3** Dynamic Light Scattering measurement data of Ag-Ru/LDH.

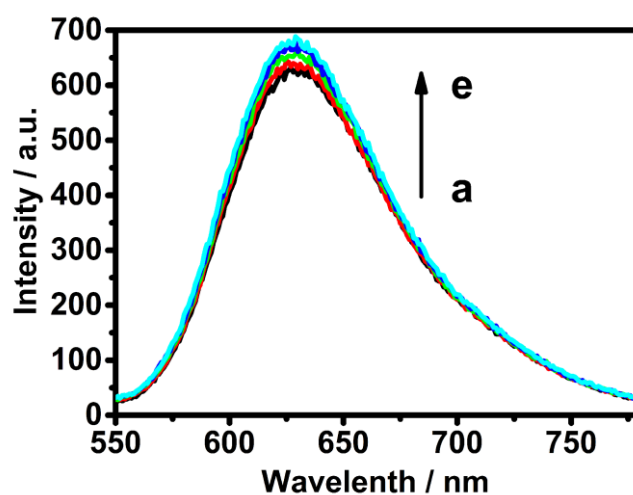

**Fig. S4** Fluorescence emission spectra of Ru/LDH titrated by varying concentrations of AgNPs in a pH 7 solution. The volumes of AgNPs solution were (a) 0, (b) 10  $\mu\text{L}$ , (c) 20  $\mu\text{L}$ , (d) 30  $\mu\text{L}$ , (e) 40  $\mu\text{L}$ .

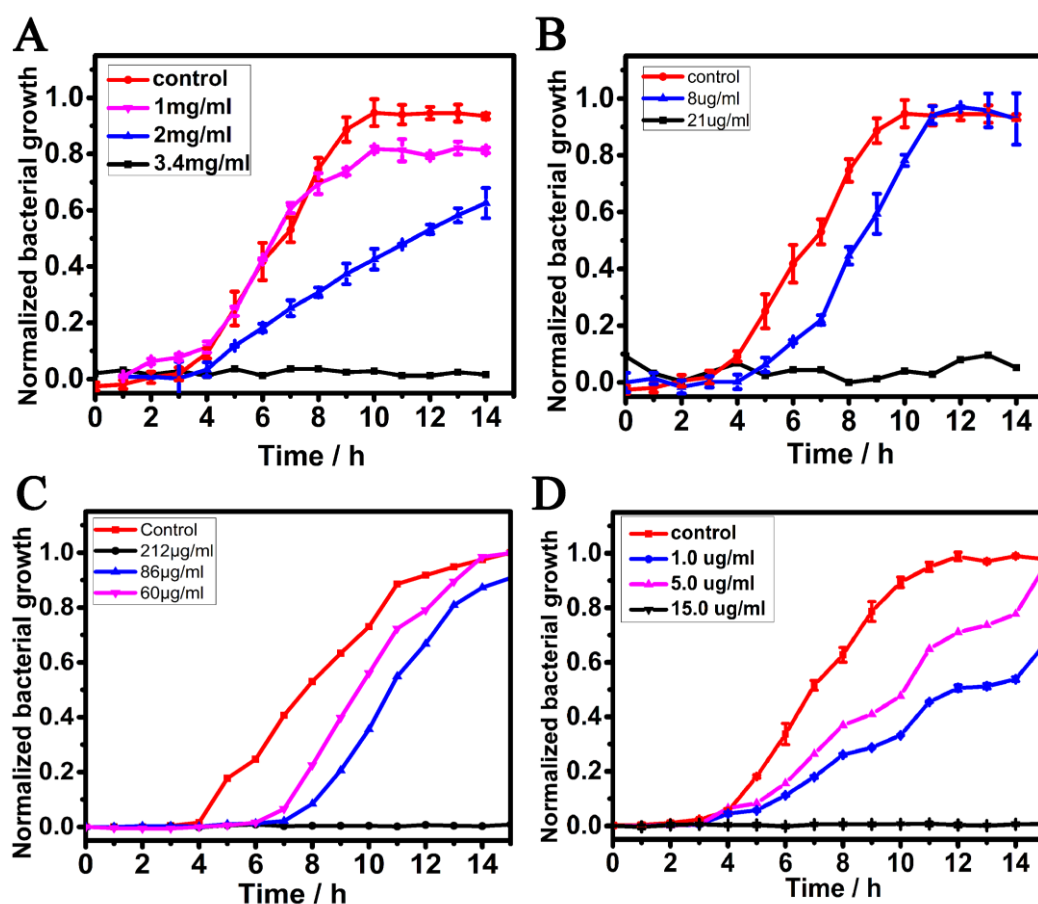

**Fig. S5** Bacterial growth curve of (A) *E. coli* and (C) *S. aureus* in LB liquid medium in the presence of different concentration of Ru/LDH in light. Bacterial growth curve of (B) *E. coli* and (D) *S. aureus* in LB liquid medium in the presence of different concentration of AgNPs.

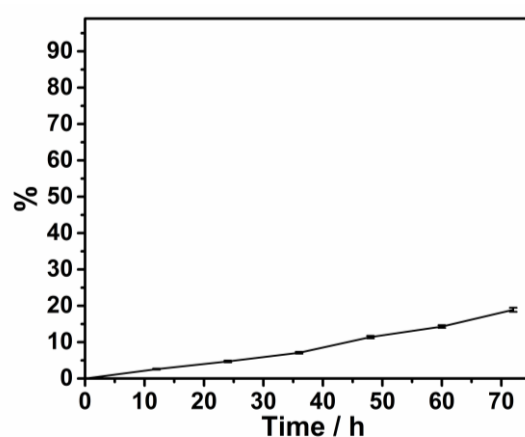

**Fig. S6** The Ru release property of Ag-Ru/LDH hybrid. A dialysis bag of Ag-Ru/LDH were immersed and shaken in PBS solution (pH 7.4) at 37 °C. The concentration of Ru is determined by the emission intensity of Ru.

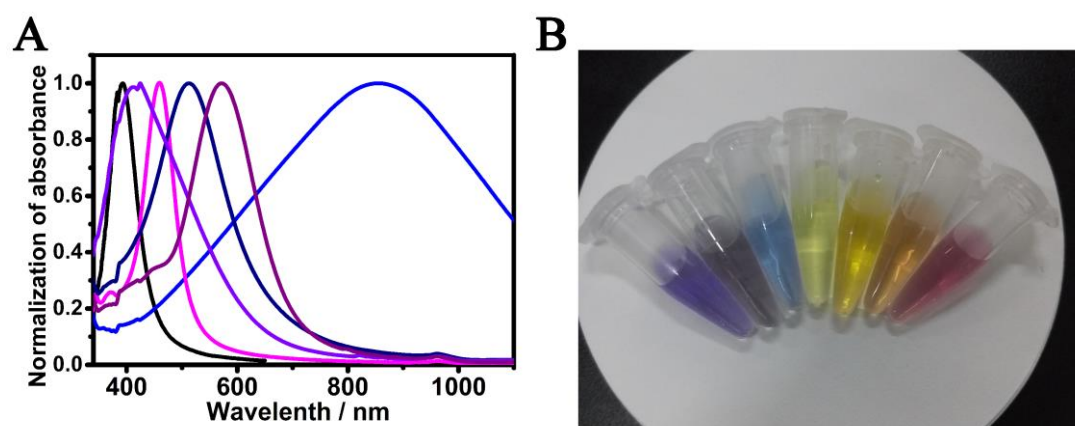

**Fig. S7** UV-*vis* spectra (**A**) and images (**B**) of AgNPs.
